# Supplementary material for: Organic–inorganic hybrid perovskite for low-cost and high-performance xerographic photoreceptors
Source: Royal Society of Chemistry journal article supplement (doi:10.1039/d1ra02717d), 2021-01-01
Supplement: d1ra02717d1.pdf [file d1ra02717d1.pdf]

## Supporting Information

### Organic-Inorganic Hybrid Perovskite for Low-Cost and High-Performance Xerographic Photoreceptors

*Wei-Min Gu, Chuanxi Wang, Cai-Yan Gao, Xin-Heng Fan, Lian-Ming Yang\*, and Ke-Jian Jiang\**

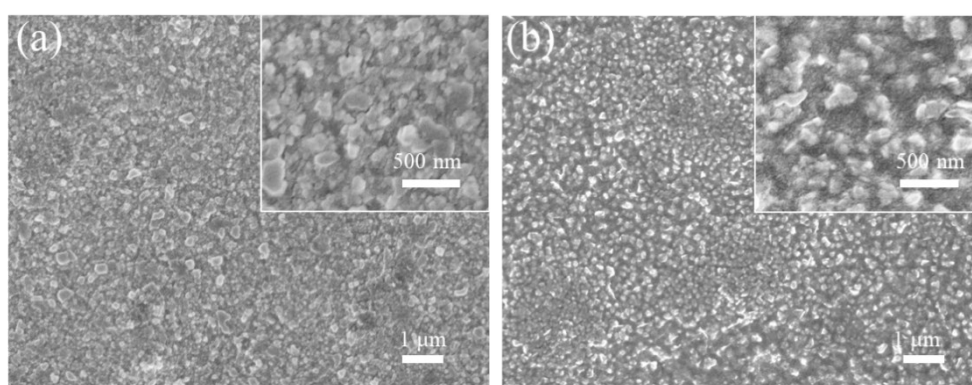

Fig. S1 Top SEM of the perovskite films with different PEG concentration: PEG:MAPbI<sub>3</sub> = 1.5:1 (a), and 2:1 (b).

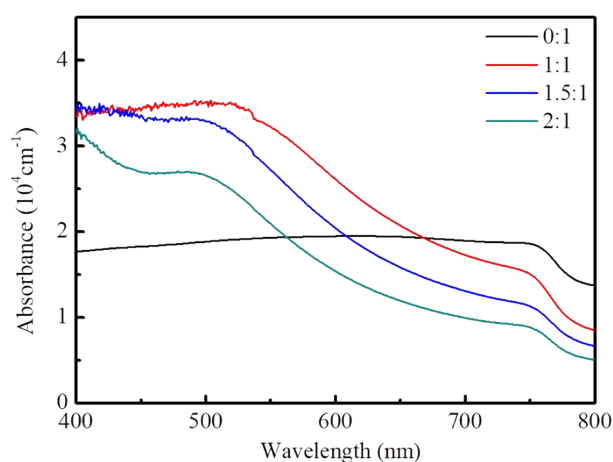

Fig. S2 The UV-vis optical absorption of the MAPbI<sub>3</sub> films with and without PEG, the molar ratios of PEG to MAPbI<sub>3</sub> are 0:1, 1:1, 1.5:1, and 2:1, respectively.

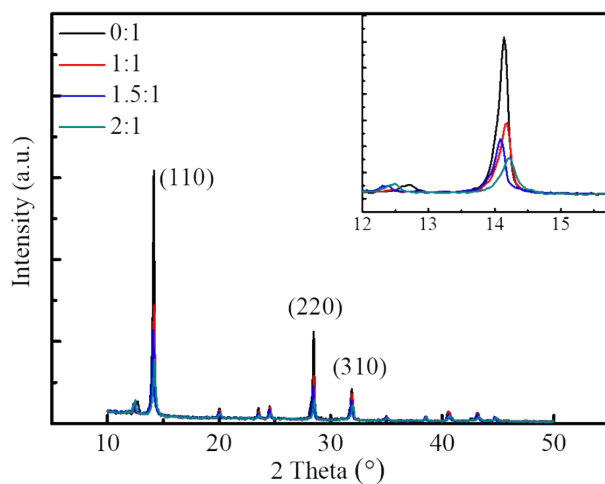

Fig. S3 XRD patterns of the MAPbI<sub>3</sub> films with and without PEG, the molar ratios of PEG to MAPbI<sub>3</sub> are 0:1, 1:1, 1.5:1 and 2:1, respectively.

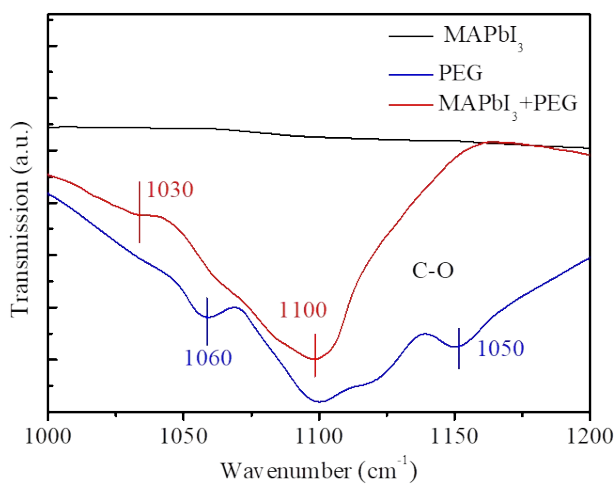

Fig. S4 FTIR spectra of PEG and MAPbI<sub>3</sub> with and without PEG.

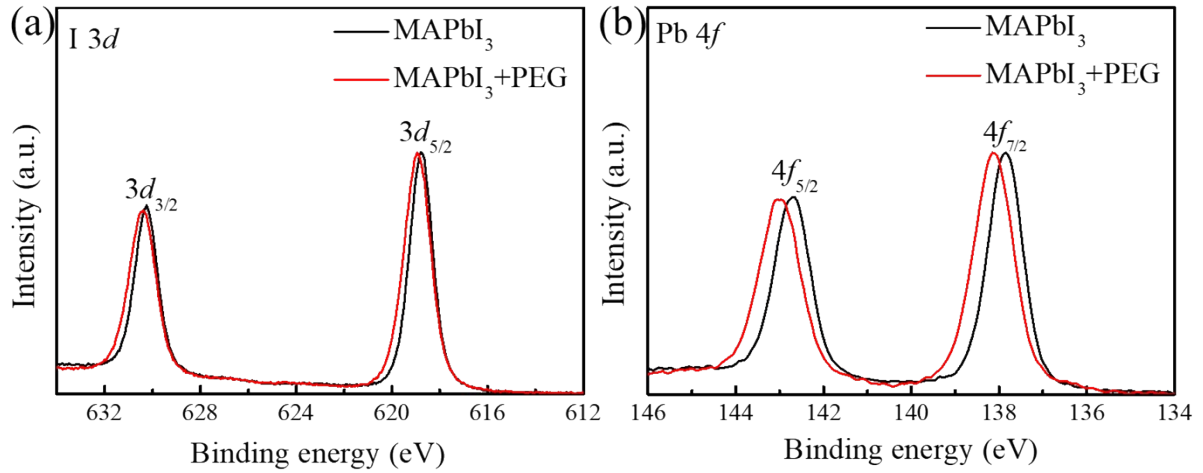

Fig. S5 The narrow scan XPS spectra of I 3d (a) and Pb 4f (b) of the MAPbI<sub>3</sub> films with and without PEG.

Table S1 Xerographic properties of Perovskite photoreceptors under 780-nm illumination.

| Device (PEG: MAPbI <sub>3</sub> ) | $V_0$ [ V ] | $R_d$ [ V s ] | $E_{0.5}$ [ $\mu$ J cm <sup>-2</sup> ] | $V_r$ [ V ] |
|-----------------------------------|-------------|---------------|----------------------------------------|-------------|
| 0:1                               | -335        | 58            | 0.077                                  | -2          |
| 1:1                               | -715        | 12            | 0.138                                  | -2          |
| 1.5:1                             | -776        | 16            | 0.163                                  | -9          |
| 2:1                               | -790        | 12            | 0.225                                  | -4          |

Note: All photoconductive data listed in the table were measured with a corona voltage of -5 kV and a monochromatic light of 1.0  $\mu$ W ( $\lambda$ : 780 nm).

Table S2 Xerographic properties of a perovskite photoreceptor (PEG:MAPbI<sub>3</sub> = 1:1) after ageing.

| No. | Ageing Time [d] | $V_0$ [ V ] | $R_d$ [ V s ] | $E_{0.5}$ [ $\mu$ J cm <sup>-2</sup> ] | $V_r$ [ V ] |
|-----|-----------------|-------------|---------------|----------------------------------------|-------------|
| 1   | 0               | -727        | 12            | 0.071                                  | -2          |
| 2   | 30              | -741        | 13            | 0.088                                  | -3          |

Note: The photoreceptor was stored at a temperature of 50 °C with humidity of 40–50 RH% for 30 days, and measured with a corona voltage of -5 kV and a monochromatic light of 1.0  $\mu$ W ( $\lambda$ : 550 nm).
